# Supplementary material
Source: MDPI journal article supplement (https://www.mdpi.com/2227-9717/9/11/2079)
Supplement: s1 [file s1]

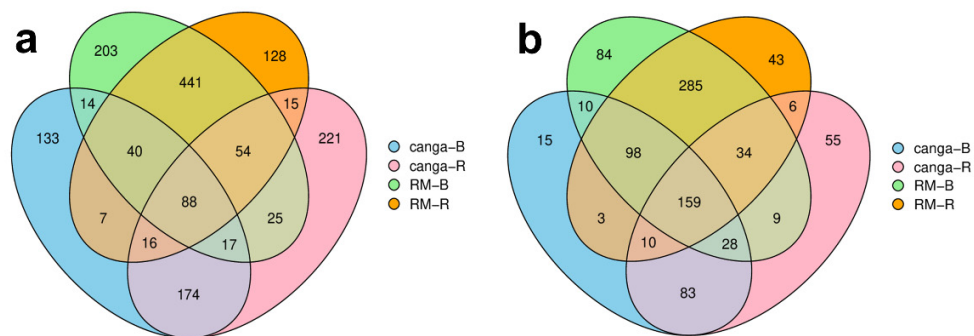

**Figure S1.** Venn diagram of soil fungal (A) and bacterial OTUs (B) in rhizospheric (R) or bulk (B) soil substrate samples of *Mimosa acutistipula* growing in a *canga* ecosystem (*canga*) or a rehabilitating mineland (RM) in Serra dos Carajás, eastern Amazon.

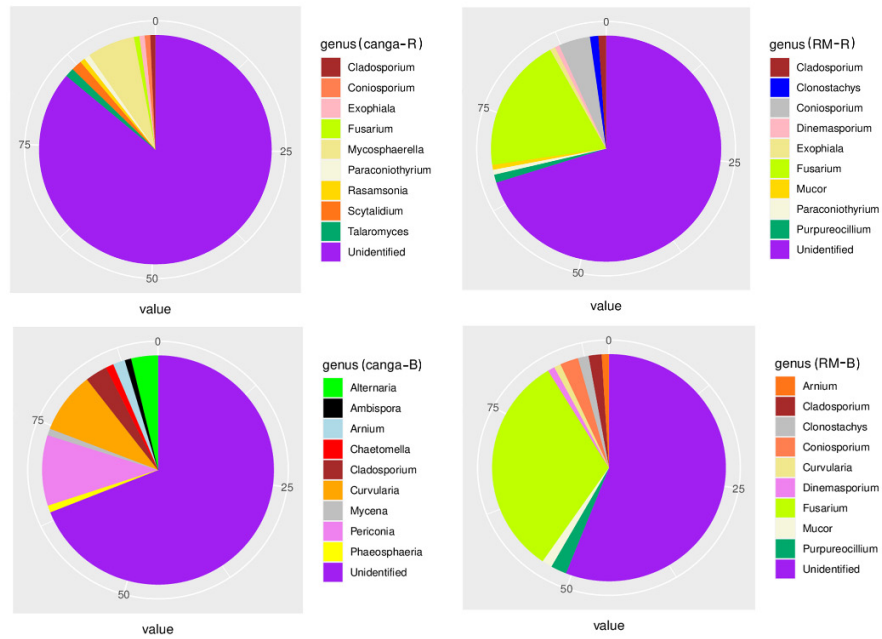

**Figure S2.** Relative abundance at the genus level of major fungal 18S rRNA sequences obtained from *Mimosa acutistipula* growing in a *canga* ecosystem (*canga*) or a rehabilitating mineland (RM) in Serra dos Carajás, eastern Amazon.

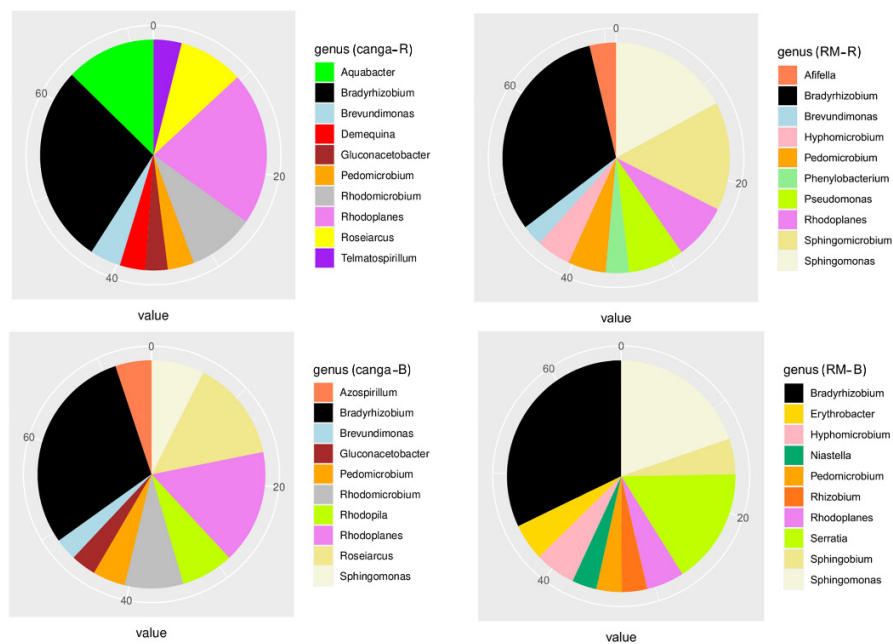

**Figure S3.** Relative abundance at the genus level of bacterial 16S rRNA sequences obtained from *Mimosa acutistipula* growing in a *canga* ecosystem (*canga*) or a rehabilitating mineland (RM) in Serra dos Carajás, eastern Amazon.

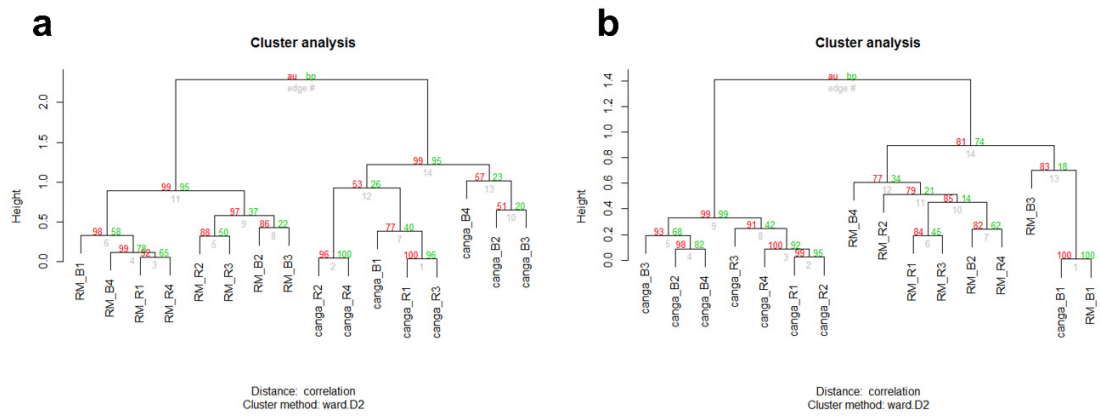

**Figure S4.** Clustering of fungal 18S rRNA (a) and bacterial 16S rRNA (b) sequences in rhizospheric (R) or bulk (B) soil samples of *Mimosa acutistipula* (M) growing in a *canga* ecosystem (*canga*) or a rehabilitating mineland (RM) in Serra dos Carajás, eastern Amazon.



**Table S1.** Physical and chemical characteristics of soil substrates associated with *Mimosa acutistipula* growing in a *canga* or rehabilitating mineland (RM).

|                             | <b>RM</b>    | <b><i>Canga</i></b> |
|-----------------------------|--------------|---------------------|
| Clay <sup>a</sup>           | 486,7 ± 37.2 | 287,5 ± 103         |
| Silt <sup>a</sup>           | 158,3 ± 40.8 | 87,5 ± 75           |
| Sand <sup>a</sup>           | 355 ± 68.9   | 625 ± 177           |
| pH H <sub>2</sub> O         | 6,1 ± 0.3    | 4,7 ± 0.6           |
| pH CaCl <sub>2</sub>        | 5,3 ± 0.2    | 4,2 ± 0.3           |
| Available P <sup>b</sup>    | 19,5 ± 15.9  | 1 ± 0.9             |
| Total N <sup>c</sup>        | 0,1 ± 0.06   | 0,4 ± 0.3           |
| Organic matter <sup>d</sup> | 1,4 ± 0.6    | 7,7 ± 0.9           |
| Na <sup>b</sup>             | 4,7 ± 0.6    | 11,4 ± 6.2          |
| K <sup>b</sup>              | 22,6 ± 6.8   | 22,7 ± 6.8          |
| B <sup>b</sup>              | 0,1 ± 0.03   | 0,2 ± 0.08          |
| Cu <sup>b</sup>             | 0,6 ± 0.3    | 1,8 ± 0.5           |
| Fe <sup>b</sup>             | 11,3 ± 6.3   | 372 ± 92            |
| Mn <sup>b</sup>             | 59,7 ± 9.4   | 2,8 ± 1.5           |
| Zn <sup>b</sup>             | 2,1 ± 1.6    | 1,4 ± 0.9           |

<sup>a</sup> g kg<sup>-1</sup>

<sup>b</sup> mg dm<sup>-3</sup>

<sup>c</sup> %

<sup>d</sup> dag kg<sup>-1</sup>

**Table S2.** Fungal 18S rRNA sequences obtained in rhizospheric and bulk soil samples from *Mimosa acutistipula* growing in a *canga* (*canga*) or a rehabilitating mineland (RM).

| Plant specie               | Sample site  | Soil source | Sample ID        | Total reads | Read after filtering | Number of OTU |
|----------------------------|--------------|-------------|------------------|-------------|----------------------|---------------|
| <i>Mimosa acutistipula</i> | <i>Canga</i> | Rhizosphere | <i>canga</i> -R1 | 255991      | 201572               | 542           |
|                            |              |             | <i>canga</i> -R2 | 322665      | 257605               | 579           |
|                            |              |             | <i>canga</i> -R3 | 220560      | 143587               | 471           |
|                            |              |             | <i>canga</i> -R4 | 89712       | 70495                | 470           |
|                            |              | Bulk        | <i>canga</i> -B1 | 49697       | 39879                | 232           |
|                            |              |             | <i>canga</i> -B2 | 221120      | 173986               | 375           |
|                            |              |             | <i>canga</i> -B3 | 163765      | 115200               | 330           |
|                            |              |             | <i>canga</i> -B4 | 165339      | 119908               | 469           |
|                            | RM           | Rhizosphere | RM-R1            | 254016      | 210226               | 737           |
|                            |              |             | RM-R2            | 313656      | 132732               | 436           |
|                            |              |             | RM-R3            | 20607       | 126926               | 493           |
|                            |              |             | RM-R4            | 248033      | 175531               | 722           |
|                            |              | Bulk        | RM-B1            | 163765      | 226122               | 684           |
|                            |              |             | RM-B2            | 296340      | 4503                 | 197           |
|                            |              |             | RM-B3            | 188122      | 162984               | 495           |
|                            |              |             | RM-B4            | 184655      | 163293               | 699           |

**Table S3.** Bacterial 16S rRNA sequences obtained in rhizospheric and bulk soil samples from *Mimosa acutistipula* growing in a *canga* (*canga*) or rehabilitating mineland (RM).

| Plant specie               | Sample site  | Soil source | Sample ID        | Total reads | Read after filtering | Number of OTU |
|----------------------------|--------------|-------------|------------------|-------------|----------------------|---------------|
| <i>Mimosa acutistipula</i> | <i>Canga</i> | Rhizosphere | <i>canga</i> -R1 | 171026      | 26539                | 376           |
|                            |              |             | <i>canga</i> -R2 | 186239      | 30134                | 372           |
|                            |              |             | <i>canga</i> -R3 | 94558       | 16726                | 240           |
|                            |              |             | <i>canga</i> -R4 | 116008      | 6597                 | 234           |
|                            |              | Bulk        | <i>canga</i> -B1 | 147974      | 22873                | 295           |
|                            |              |             | <i>canga</i> -B2 | 220057      | 27277                | 220           |
|                            |              |             | <i>canga</i> -B3 | 195881      | 23535                | 418           |
|                            |              |             | <i>canga</i> -B4 | 119161      | 12452                | 287           |
|                            | RM           | Rhizosphere | RM-R1            | 174851      | 24177                | 504           |
|                            |              |             | RM-R2            | 113964      | 13648                | 432           |
|                            |              |             | RM-R3            | 151960      | 20845                | 513           |
|                            |              |             | RM-R4            | 467029      | 6892                 | 311           |
|                            |              | Bulk        | RM-B1            | 233428      | 42968                | 414           |
|                            |              |             | RM-B2            | 219140      | 28426                | 504           |
|                            |              |             | RM-B3            | 190153      | 27779                | 458           |
|                            |              |             | RM-B4            | 314963      | 33040                | 507           |



**Table S4.** Most abundant fungal and bacterial taxa identified in soils associated with *Mimosa acutistipula* growing in a *canga* or rehabilitating mineland (RM) in Serra dos Carajás, eastern Amazon.

| Identification source |                    | Identified Phyla (RA %)                                                                                                           | Identified Genera (RA %)                                                                                                                                                                                                                                                                                  |
|-----------------------|--------------------|-----------------------------------------------------------------------------------------------------------------------------------|-----------------------------------------------------------------------------------------------------------------------------------------------------------------------------------------------------------------------------------------------------------------------------------------------------------|
| FUNGI                 | <i>Rhizosphere</i> | Ascomycota (98.10); Basidiomycota (1.04); Mucoromycota (0.55); Unidentified (0.31)                                                | Unidentified (85.4); <i>Mycosphaerella</i> (6.61); <i>Scytalidium</i> (1.49); <i>Talaromyces</i> (1.24); <i>Paraconiothyrium</i> (0.82); <i>Coniosporium</i> (0.78); <i>Fusarium</i> (0.75); <i>Exophiala</i> (0.71); <i>Cladosporium</i> (0.69); <i>Rasamsonia</i> (0.67)                                |
|                       |                    |                                                                                                                                   |                                                                                                                                                                                                                                                                                                           |
|                       | <i>Canga</i>       |                                                                                                                                   |                                                                                                                                                                                                                                                                                                           |
|                       | <i>Bulk</i>        | Ascomycota (95.80); Basidiomycota (2.17); Glomeromycota (1.34); Chytridiomycota (0.41); Unidentified (0.28)                       | Unidentified (63.6); <i>Periconia</i> (9.19); <i>Curvularia</i> (7.97); <i>Alternaria</i> (3.46); <i>Cladosporium</i> (2.84); <i>Arnium</i> (1.56); <i>Chaetomella</i> (1.01); <i>Phaeosphaeria</i> (0.89); <i>Mycena</i> (0.86); <i>Ambispora</i> (0.81)                                                 |
|                       |                    |                                                                                                                                   |                                                                                                                                                                                                                                                                                                           |
|                       | RM                 |                                                                                                                                   |                                                                                                                                                                                                                                                                                                           |
| BACTERIA              | <i>Rhizosphere</i> | Ascomycota (93.1), Basidiomycota (4.83); Glomeromycota (1.25); unidentified (0.40); Mucoromycota (0.31); Mortierellomycota (0.11) | Unidentified (65.6); <i>Fusarium</i> (18.0); <i>Coniosporium</i> (4.16); <i>Clonostachys</i> (1.1); <i>Purpureocillium</i> (1.08); <i>Cladosporium</i> (1.0); <i>Exophiala</i> (0.69); <i>Mucor</i> (0.66); <i>Paraconiothyrium</i> (0.64); <i>Dinemasporium</i> (0.59); <i>Thielavia</i> (0.53)          |
|                       |                    |                                                                                                                                   |                                                                                                                                                                                                                                                                                                           |
|                       | <i>Canga</i>       |                                                                                                                                   |                                                                                                                                                                                                                                                                                                           |
|                       | <i>Bulk</i>        | Ascomycota (94.2); Basidiomycota (2.3); Mucoromycota (1.51); Glomeromycota (1.25); unidentified (0.74)                            | Unidentified (50.7); <i>Fusarium</i> (28.7); <i>Coniosporium</i> (2.32); <i>Purpureocillium</i> (1.99); <i>Cladosporium</i> (1.61); <i>Clonostachys</i> (1.31); <i>Mucor</i> (1.25); <i>Arnium</i> (0.9); <i>Dinemasporium</i> (0.88); <i>Curvularia</i> (0.83); <i>Myceliophthora</i> (0.71)             |
|                       |                    |                                                                                                                                   |                                                                                                                                                                                                                                                                                                           |
|                       | RM                 |                                                                                                                                   |                                                                                                                                                                                                                                                                                                           |
| BACTERIA              | <i>Rhizosphere</i> | Acidobacteria (56.2); Proteobacteria (33.2); Actinobacteria (8.63); candidate_division_WPS-1 (1.97)                               | <i>Bradyrhizobium</i> (20.3); <i>Rhodoplanes</i> (15.6); <i>Aquabacter</i> (9.24); <i>Rhodomicrobium</i> (6.82); <i>Roseiarcus</i> (6.69); <i>Brevundimonas</i> (3.18); <i>Telmatosporillum</i> (2.89); <i>Pedomicrobium</i> (2.72); <i>Demequina</i> (2.65); <i>Gluconacetobacter</i> (2.27);            |
|                       |                    |                                                                                                                                   |                                                                                                                                                                                                                                                                                                           |
|                       | <i>Canga</i>       |                                                                                                                                   |                                                                                                                                                                                                                                                                                                           |
|                       | <i>Bulk</i>        | Acidobacteria (71.8); Proteobacteria (24.0); Actinobacteria (3.49); candidate_division_WPS-1 (0.71)                               | <i>Bradyrhizobium</i> (22.4); <i>Rhodoplanes</i> (12.2); <i>Roseiarcus</i> (10.8); <i>Rhodomicrobium</i> (6.27); <i>Sphingomonas</i> (5.64); <i>Rhodopila</i> (5.58); <i>Azospirillum</i> (3.85); <i>Pedomicrobium</i> (3.49); <i>Gluconacetobacter</i> (2.68); <i>Brevundimonas</i> (2.35)               |
|                       |                    |                                                                                                                                   |                                                                                                                                                                                                                                                                                                           |
|                       | RM                 |                                                                                                                                   |                                                                                                                                                                                                                                                                                                           |
| BACTERIA              | <i>Rhizosphere</i> | Proteobacteria (54.3); Acidobacteria (28.8); Actinobacteria (14.7); Bacteroidetes (1.22); Firmicutes (0.98)                       | <i>Bradyrhizobium</i> (20.7); <i>Sphingomonas</i> (16.5); <i>Sphingomicrobium</i> (5.24); <i>Pseudomonas</i> (5.18); <i>Rhodoplanes</i> (4.84); <i>Pedomicrobium</i> (4.59); <i>Hyphomicrobium</i> (2.51); <i>Aftifella</i> (2.4); <i>Phenylobacterium</i> (2.15); <i>Brevundimonas</i> (2.07)            |
|                       |                    |                                                                                                                                   |                                                                                                                                                                                                                                                                                                           |
|                       | <i>Canga</i>       |                                                                                                                                   |                                                                                                                                                                                                                                                                                                           |
|                       | <i>Bulk</i>        | Proteobacteria (56.6); Acidobacteria (33.6); Actinobacteria (8.59); Bacteroidetes (0.85); Candidate_division_WPS-1 (0.36)         | <i>Bradyrhizobium</i> (21.3); <i>Sphingomonas</i> (13.1); <i>Serratia</i> (10.8); <i>Hyphomicrobium</i> (3.81); <i>Rhodoplanes</i> (3.52); <i>Erythrobacter</i> (3.41); <i>Sphingobium</i> (3.3); <i>Rhizobium</i> (2.4); <i>Pedomicrobium</i> (2.37); <i>Niastella</i> (2.31); <i>Actinotalea</i> (1.96) |
|                       |                    |                                                                                                                                   |                                                                                                                                                                                                                                                                                                           |
|                       | RM                 |                                                                                                                                   |                                                                                                                                                                                                                                                                                                           |
